# Supplementary material
Source: PubMed Central journal article supplement (PMC7833425)
Supplement: mmc2.pdf [file mmc2.pdf]

**Sup Table 1: Subgroup analysis of the primary outcome of recovery in patients infected with coronavirus disease 2019 by clinical classification with Cox proportional hazards models.**

| Clinical Classification       | Time from onset of symptoms to treatment with QFPDD <sup>#</sup> | Univariate         |                       | Multivariable     |                       |                  |                       |
|-------------------------------|------------------------------------------------------------------|--------------------|-----------------------|-------------------|-----------------------|------------------|-----------------------|
|                               |                                                                  | Unadj. HR (95% CI) | <i>P</i> <sup>a</sup> | Adj. HR (95% CI)  | <i>P</i> <sup>b</sup> | Adj. HR (95% CI) | <i>P</i> <sup>c</sup> |
| <b>Non-severe<sup>d</sup></b> |                                                                  |                    |                       |                   |                       |                  |                       |
|                               | ≤1 week                                                          | 4.34(3.40,5.55)    | <b>&lt;0.0001</b>     | 3.01(2.13,4.25)   | <b>&lt;0.0001</b>     | 3.75(2.56,5.49)  | <b>&lt;0.0001</b>     |
|                               | 1-2 weeks                                                        | 3.16(2.44,4.08)    | <b>&lt;0.0001</b>     | 2.59(1.86,3.61)   | <b>&lt;0.0001</b>     | 2.47(1.72,3.56)  | <b>&lt;0.0001</b>     |
|                               | 2-3 weeks                                                        | 2.26(1.69,3.01)    | <b>&lt;0.0001</b>     | 1.93(1.37,2.72)   | <b>0.0002</b>         | 1.80(1.23,2.64)  | <b>0.0026</b>         |
|                               | >3 weeks                                                         | ref. = 1           |                       | ref. = 1          |                       | ref. = 1         |                       |
| <b>Severe<sup>e</sup></b>     |                                                                  |                    |                       |                   |                       |                  |                       |
|                               | ≤1 week                                                          | 5.59(2.02,15.48)   | <b>0.0009</b>         | 8.42(1.63,43.60)  | <b>0.0111</b>         | 2.01(0.21,19.40) | 0.5475                |
|                               | 1-2 weeks                                                        | 5.80(1.83,18.45)   | <b>0.0029</b>         | 11.85(2.20,63.78) | <b>0.0040</b>         | 1.36(0.15,12.13) | 0.7843                |
|                               | 2-3 weeks                                                        | 2.39(0.95,5.98)    | 0.0631                | 4.63(1.20,17.95)  | <b>0.0265</b>         | 3.60(0.75,17.38) | 0.1106                |
|                               | >3 weeks                                                         | ref. = 1           |                       | ref. = 1          |                       | ref. = 1         |                       |

Abbreviation: ref.: reference; Unadj.: unadjusted; Adj.: adjusted; CI: confidence interval; HR: hazard ratio. HRs and their 95% CIs were calculated by Cox proportional risk model. The proportional hazards assumption was not violated ( $P>0.05$ ). Bold indicates statistically significant  $<0.05$ .

<sup>#</sup> Patients were divided into four groups: the ≤1 week group (≤7 days), 1-2 week group (>7 days and ≤14 days), 2-3 week group (>14 days and ≤21 days) and >3 week group (>21 days).

a unadjusted result.

b adjusted by covariates at baseline, including age, sex, clinical classification, exposure of visiting Wuhan in the past 14 days, days from onset of symptoms to hospital admission, fever and cough in admission, any comorbidity, anti-virus, expectorant and CT imaging, which were selected by stepwise selection method ( $P=0.05$ ).

c adjusted by propensity score and other covariates. Propensity scores were derived from a multivariable logistic regression that included covariates selected by the stepwise selection method at baseline. The covariates that were significant in univariate analysis but not selected in the stepwise method were included into model as other covariates.

d including mild cases and moderate cases.

e including severe cases and critical cases.

**Sup Table 2: Subgroup analysis of the secondary outcomes in patients infected with coronavirus disease 2019 by clinical classification.**

| Clinical Classification                 | Outcomes                                      | All patients       | Time from onset of symptoms to treatment with QFPDD <sup>#</sup> |                      |                      |                     | P value           |
|-----------------------------------------|-----------------------------------------------|--------------------|------------------------------------------------------------------|----------------------|----------------------|---------------------|-------------------|
|                                         |                                               | No. (%)<br>(n=782) | ≤1 week<br>(n=321)                                               | 1-2 weeks<br>(n=221) | 2-3 weeks<br>(n=123) | >3 weeks<br>(n=117) |                   |
| Nonsevere <sup>a</sup>                  | <b>Days of viral shedding <sup>c</sup></b>    |                    |                                                                  |                      |                      |                     |                   |
|                                         | median, days                                  | 13.0(8.0)          | 12.0(7.0)                                                        | 12.0(6.0)            | 13.0(8.0)            | 17.0(10.5)          | <b>0.0279</b>     |
|                                         | <b>Duration of hospital stay <sup>c</sup></b> |                    |                                                                  |                      |                      |                     |                   |
|                                         | median, days                                  | 15.0(9.0)          | 14.0(8.0)                                                        | 15.0(9.0)            | 15.0(9.0)            | 18.0(12.0)          | <b>&lt;0.0001</b> |
|                                         | <b>Course of disease <sup>c</sup></b>         |                    |                                                                  |                      |                      |                     |                   |
|                                         | median, days                                  | 21.0(12.0)         | 17.5(8.0)                                                        | 21.0(8.0)            | 24.0(8.0)            | 34.0(10.5)          | <b>&lt;0.0001</b> |
|                                         | <b>CT imaging <sup>d</sup></b>                |                    |                                                                  |                      |                      |                     |                   |
| Foci absorption, or no abnormal lesions | 416(77%)                                      | 167(76%)           | 116(73%)                                                         | 70(81%)              | 63(84%)              | 0.8032              |                   |
| No significant change                   | 93(17%)                                       | 36(16%)            | 32(20%)                                                          | 13(15%)              | 12(16%)              |                     |                   |
| Progress                                | 32(6%)                                        | 18(8%)             | 11(7%)                                                           | 3(3%)                | 0                    |                     |                   |
| Severe <sup>b</sup>                     | <b>Days of viral shedding <sup>c</sup></b>    |                    |                                                                  |                      |                      |                     |                   |
|                                         | median, days                                  | 15.0(9.0)          | 16.0(10.0)                                                       | 10.0(6.0)            | 12.0(11.0)           | 19.0(10.0)          | 0.0750            |
|                                         | <b>Duration of hospital stay <sup>c</sup></b> |                    |                                                                  |                      |                      |                     |                   |
|                                         | median, days                                  | 16.5(3.0)          | 16.0(14.0)                                                       | 16.0(11.0)           | 15.0(8.0)            | 20.0(14.0)          | 0.2145            |
|                                         | <b>Course of disease <sup>c</sup></b>         |                    |                                                                  |                      |                      |                     |                   |
|                                         | median, days                                  | 23.0(17.0)         | 20.0(15.0)                                                       | 22.0(13.5)           | 26.0(14.0)           | 34.0(21.0)          | 0.4562            |
|                                         | <b>CT imaging <sup>d</sup></b>                |                    |                                                                  |                      |                      |                     |                   |
| Foci absorption, or no abnormal lesions | 41(73%)                                       | 9(64%)             | 10(83%)                                                          | 8(67%)               | 14(78%)              | <b>0.0455</b>       |                   |
| No significant change                   | 10(18%)                                       | 1(7%)              | 2(17%)                                                           | 3(25%)               | 4(22%)               |                     |                   |
| Progress                                | 5(9%)                                         | 4(29%)             | 0                                                                | 1(8%)                | 0                    |                     |                   |

Abbreviation: No.: number of patients. Totals do not sum to 100% because of rounding or missing data. Bold indicates statistically significant <0.05.

<sup>#</sup> Patients were divided into four groups: the ≤1 week group (≤7 days), 1-2 week group (>7 days and ≤14 days), 2-3 week group (>14 days and ≤21 days) and >3 week group

(>21 days).

<sup>a</sup> including mild cases and moderate cases.

<sup>b</sup> including severe cases and critical cases.

<sup>c</sup> Outcomes were used by logarithm transformation and *P* values were calculated by multiple linear regression model. Covariates were selected by the stepwise selection method (*P*=0.05) and were then used to estimate propensity scores in a multivariable logistic regression. *P* values were adjusted by propensity score and other significant covariates at baseline in the univariate analysis.

<sup>d</sup> *P* values were calculated by a multinomial logistic regression model adjusted by propensity score and other covariate variables.
